# Supplementary material for: Identification of an endogenous glutamatergic transmitter system controlling excitability and conductivity of atrial cardiomyocytes
Source: PubMed Central journal article supplement (PMC8410866; doi:10.1038/s41422-021-00499-5), 2021-04-06
Supplement: 41422_2021_499_MOESM1_ESM.pdf [file 41422_2021_499_MOESM1_ESM.pdf]

## **Supplementary Materials For**

**Title: Identification of an endogenous glutamatergic transmitter system  
controlling excitability and conductivity of atrial cardiomyocytes.**

**This file includes:**

Supplementary information, Tables S1

**Table S1. List of primers used for quantitative PCR (qPCR).**

| Gene          | Species | Forward Primer             | Reverse Primer             |
|---------------|---------|----------------------------|----------------------------|
| <i>Nppa</i>   | Rat     | CAACACAGATCTGATGGATTCA     | CCTCATCTTCTACCGGCATC       |
| <i>Gls</i>    | Rat     | GAATAAGATGGCTGGTAATGAATATG | ACACTTGCTGACTCACACG        |
| <i>Gria1</i>  | Rat     | AGGCTGGTGGTGGTTGAC         | ACATTGGCTCCGCTCTCC         |
| <i>Gria2</i>  | Rat     | CAACACTGGAAGAGAAAGAATACC   | TCACTTGGACAGCATCATAACG     |
| <i>Gria3</i>  | Rat     | TTATACAACACCAACCAGAACAC    | ATAGAATCCAAAGATAGCATAACACC |
| <i>Gria4</i>  | Rat     | TTGTGATAGATTGTGAGATAGAGAG  | TTGCGATGATATAATGGTAGCC     |
| <i>Grik1</i>  | Rat     | CGGACTATGCGGCTATCAG        | GAGGTTTGGCGTCTTTATTCCG     |
| <i>Grik2</i>  | Rat     | CTGATGCTGCTCTGATGTATG      | CTGCCTGTGAGACCTTCC         |
| <i>Grik3</i>  | Rat     | CGAGGAGGAGAACAAGGAG        | AACACGGACAGGACTAAGC        |
| <i>Grik4</i>  | Rat     | GCTTCTGCTTGGCTCTTG         | CGGTTGATGCGGTTCTTGG        |
| <i>Grik5</i>  | Rat     | GCATCTGTCAGCCTGTATCC       | GCGGTGATGGTGAAGGC          |
| <i>Grin1</i>  | Rat     | CAGTGAGGAGGAGGAGGAAG       | AAGTTGGCAGTGTAGGAAGC       |
| <i>Grin2a</i> | Rat     | CAAGACAACAGTGGACAACAG      | AGCAGGATGACAGAAGAATGG      |
| <i>Grin2b</i> | Rat     | TTATCTCTGTGTCTTATGATGAATGG | GCAGCAGTGGTGTATGATGG       |
| <i>Grin2c</i> | Rat     | GGTGATGATGTTTCGTGATGTG     | GGTGAGGTTCTGGTTGTAGC       |
| <i>Grin2d</i> | Rat     | ACAACCAGCCGAGAGTG          | GCGATGCCATAACCAGTG         |
| <i>Grin3a</i> | Rat     | AAACGTGTGGAGAAGAGCAGAT     | TGGACCTAGGAAACAGAGACAAT    |
| <i>Grin3b</i> | Rat     | TGGCACTGTCTTCTTACTC        | CACTTGGGCGTCTTACTGG        |
| <i>Grina</i>  | Rat     | GAGCCCAGAAGAATATGTGTTTG    | GGTGAGAATGTATAGGAAGATGTTG  |
| <i>Grid1</i>  | Rat     | TGGACTTCAGCAAGCGATAC       | CAACACGAATATGAGCACACC      |
| <i>Grm1</i>   | Rat     | CCGAAGAAGATGAATTGGAAGAG    | CAGAATGACAGAGGCGTAGG       |
| <i>Grm2</i>   | Rat     | AATCTCCTGCGGCTGTTC         | CCTGTCTCACCATAGTCACC       |
| <i>Grm3</i>   | Rat     | CCAGAGAAGCGGGAAACAG        | GAATGCCAACCAGATGATGC       |
| <i>Grm4</i>   | Rat     | CCAGGACCAACGGACAC          | CCAGCAGGCAGATGAGG          |
| <i>Grm5</i>   | Rat     | CAATCTATTCTATGGCTTATGGACTC | GCTTCATCGCATCACAGAGG       |
| <i>Grm6</i>   | Rat     | ACTACGAGGAGCAGAGGAC        | AAGCCAGCCAGATAATACAGG      |
| <i>Grm7</i>   | Rat     | TTGTGATTGATGCTGTCTATGC     | TTCTTGCCGCTGCTTG           |
| <i>Grm8</i>   | Rat     | TGGATTGGCTCTGATAGTTGG      | ATTGTCACCGCTCCTTCTG        |
| <i>Slc1a1</i> | Rat     | TCATAGTCGTGCGGAAGAAC       | AGCGGAATGTAAGTGAAGG        |
| <i>Slc1a2</i> | Rat     | ACGACACGAAGAACCACAG        | CCGCCAGAGTTACCTTGC         |
| <i>Slc1a3</i> | Rat     | GCTTCTGATGCGGATGCTG        | TGGATGATGATGACAATGATTATGC  |
| <i>Slc1a4</i> | Rat     | TGTTGCTCTGGCGTTCATC        | TTGGAGACTGGAGGAGGTTCC      |
| <i>Slc1a5</i> | Rat     | CGGCAAGATTGTGGAGATG        | AAGTAGATGAGAGGCAGAACC      |
| <i>Slc1a6</i> | Rat     | TTCTCCTCCATCCTCAGCAG       | GGCACAGTCTCCTCAAAGC        |
| <i>Slc1a7</i> | Rat     | CTGTCTGTGCTGTCTGTCATC      | GCGGCTGGAGGTCTTGG          |
| <i>GLS</i>    | Human   | ACCTTTGAAATATGCCATTGCTG    | GTTTGTGAATCTTAGTCCACTCG    |
| <i>GRIA1</i>  | Human   | TGCTCAAGAAGAACGCCAATC      | TGACAATCTCCAGACGGTAGG      |
| <i>GRIA2</i>  | Human   | AGAGTGCGGAAGTCCAAAGG       | GGTGTGCGATGCCATAGC         |
| <i>GRIA3</i>  | Human   | TTACATTGGAGTCAGCGTAGTTC    | CGAGGTTCTTCATTGTTGTCTTC    |
| <i>GRIA4</i>  | Human   | GGTGTGTCAGCGTGGTCTTATTC    | GGTCCTTCCTTTCCGTCCTC       |
| <i>GRID1</i>  | Human   | TCCTCCTACACAGCCAAC         | TACTCATATACAGCAGAATCCC     |
| <i>GRIK1</i>  | Human   | TCTTGGTGTGGCTGCTCTC        | GGTCTGTATGTGTGGAAGTCTCG    |

|               |       |                        |                           |
|---------------|-------|------------------------|---------------------------|
| <i>GRIK2</i>  | Human | AGGATAGTGGGAGGCATTTGG  | TAAATCATCAGCAGAGTCAATAGGG |
| <i>GRIK3</i>  | Human | TATCGTGTCCGTGTGCTACC   | ACAATTCGTCCAGTTAATCCTTCC  |
| <i>GRIK4</i>  | Human | CCAGAGCCTCAACCAGTCC    | CGCAGTCAACCACAGCATAG      |
| <i>GRIK5</i>  | Human | CGCCAACGCCTCCATCTC     | GTCCTCCACAATACCGTCCAG     |
| <i>GRIN1</i>  | Human | GTGCCTCAGTGTGCTACG     | TCGCCCATCATCCCATTCC       |
| <i>GRIN2A</i> | Human | GTTTGTGGGTGATGGTGAGATG | AGATGAAGGTGATGAGGCTAAGG   |
| <i>GRIN2B</i> | Human | CACCACTGCTGCTTCTGAC    | CCCTTTCCACTTCTCTCC        |
| <i>GRIN2C</i> | Human | GGGACGGAGAGACACAGAAAC  | CCAGGCCGAAGACCAGCAG       |
| <i>GRIN2D</i> | Human | GGCTTCCACCGCTACTACG    | CTCGGCTGGCTCCTTGTC        |
| <i>GRIN3A</i> | Human | TCATCAACATCACCGCTAACC  | GTCCTCAGTTCCTCCACATTC     |
| <i>GRIN3B</i> | Human | CGAGCACGCCTTCTTCCG     | CCTTGCCGTCTCCTCCTTC       |
| <i>GRINA</i>  | Human | CTTCATCCGCAAGGTGTTCC   | AGACAGCATAGGAGACATAGTAGG  |
| <i>GRM1</i>   | Human | CTCTTCCGTGGCTCTGG      | GCAATGGGCTTCTTAGTCC       |
| <i>GRM2</i>   | Human | CTGGTGTTATTGGCGGTTCC   | GCGGGCAAAGTAGTCATAGC      |
| <i>GRM3</i>   | Human | GCAGGAGAGCATCATCAAGG   | GCGGTGGTTGTTGTAGGG        |
| <i>GRM4</i>   | Human | CGAGAAGGATGGCACAGAG    | TGAAGCACCGATGACACC        |
| <i>GRM5</i>   | Human | GCTGGCATTCCGCTGTG      | GCGGAAGGAAGAGGAGGAG       |
| <i>GRM6</i>   | Human | CCAGGAGAGTTCAGCAAGG    | TGAGCCGACCCACAGG          |
| <i>GRM7</i>   | Human | TTCTTGGGCTTGGGTATGTG   | ATGTTGGGCTTATGAGTCTGG     |
| <i>GRM8</i>   | Human | CTCCTTTCCAACATCACTCTG  | ATCTCCATTAGCACACTTCAC     |
| <i>SLC1A3</i> | Human | GGACCTCTTCAAGTTCTGCCA  | GGCAGCCAAAGCCTCATAGA      |
| <i>GAPDH</i>  | Human | AGCCACATCGCTCAGACAC    | GCCCAATACGACCAAATCC       |

---
