# Supplementary material for: Identification of an endogenous glutamatergic transmitter system controlling excitability and conductivity of atrial cardiomyocytes
Source: PubMed Central journal article supplement (PMC8410866; doi:10.1038/s41422-021-00499-5), 2021-04-06
Supplement: 41422_2021_499_MOESM2_ESM.pdf [file 41422_2021_499_MOESM2_ESM.pdf]

## **Supplementary Materials For**

**Title: Identification of an endogenous glutamatergic transmitter system  
controlling excitability and conductivity of atrial cardiomyocytes.**

**This file includes:**

Supplementary information, Table S2

**Table S2. siRNAs sequences list.**

| <b>Gene</b>  | <b>Species</b> | <b>Sequences (5'to 3')</b>                     |
|--------------|----------------|------------------------------------------------|
| <i>Gria3</i> | Human          | GGCGCAUCAUUGAAGAAUTT<br>AUUUCUCAAUGAUGCGCCTT   |
| <i>Grin1</i> | Human          | GGCAUAUGGAGAAGCACAATT<br>UUGUGCUUCUCCAUAUGCCTT |
