# Supplementary material for: Identification of an endogenous glutamatergic transmitter system controlling excitability and conductivity of atrial cardiomyocytes
Source: PubMed Central journal article supplement (PMC8410866; doi:10.1038/s41422-021-00499-5), 2021-04-06
Supplement: 41422_2021_499_MOESM4_ESM.pdf [file 41422_2021_499_MOESM4_ESM.pdf]

## **Supplementary Materials For**

**Title: Identification of an endogenous glutamatergic transmitter system  
controlling excitability and conductivity of atrial cardiomyocytes.**

**This file includes:**

Supplementary information, Legend for Video S1

## **Supplementary Video Legend**

**Video S1.** 3D reconstruction of the atrial cardiomyocyte in Fig. 1c - representing the spatial relationship between glutamate (red) and CAST (green).
